# Supplementary material for: Effects of Cu2+/Zn2+ on the electrochemical performance of polyacrylamide hydrogels as advanced flexible electrode materials
Source: Royal Society of Chemistry journal article supplement (doi:10.1039/d2ra02391a), 2022-01-01
Supplement: d2ra02391a2.pdf [file d2ra02391a2.pdf]

**Effect of  $\text{Cu}^{2+}/\text{Zn}^{2+}$  on electrochemical performance of polyacrylamide hydrogel as  
advanced flexible electrode materials**

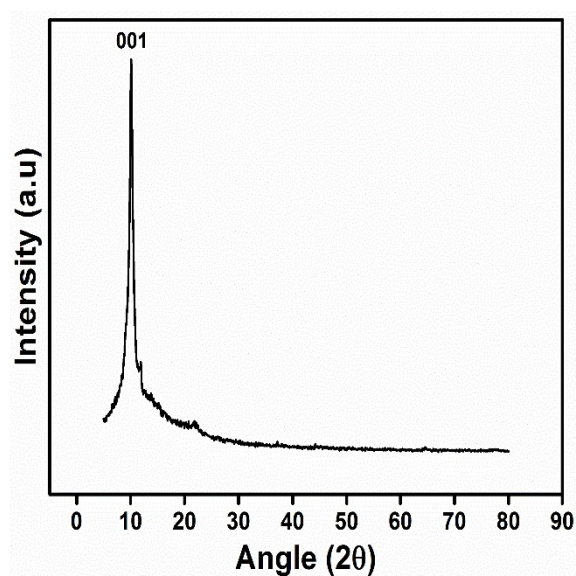

**Fig. S1:** XRD pattern of Graphene oxide

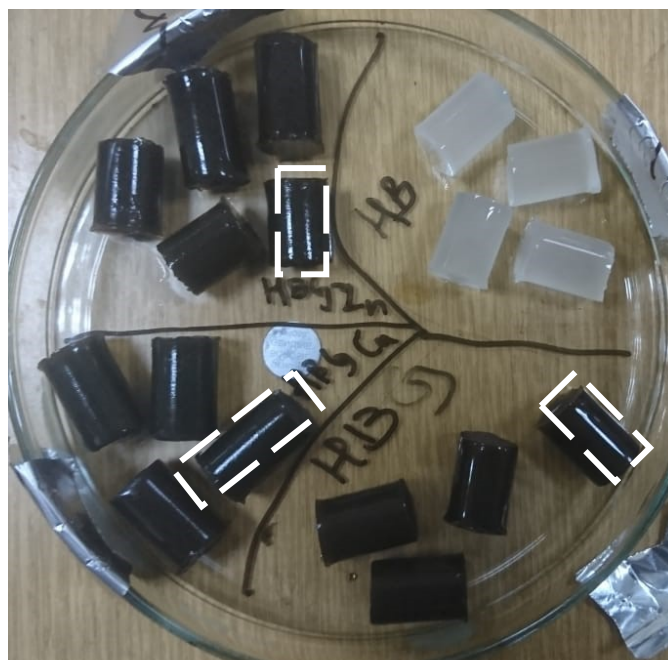

**Fig. S2**Light reflection from surface of Polyacrylamide based Hydrogels before reduction

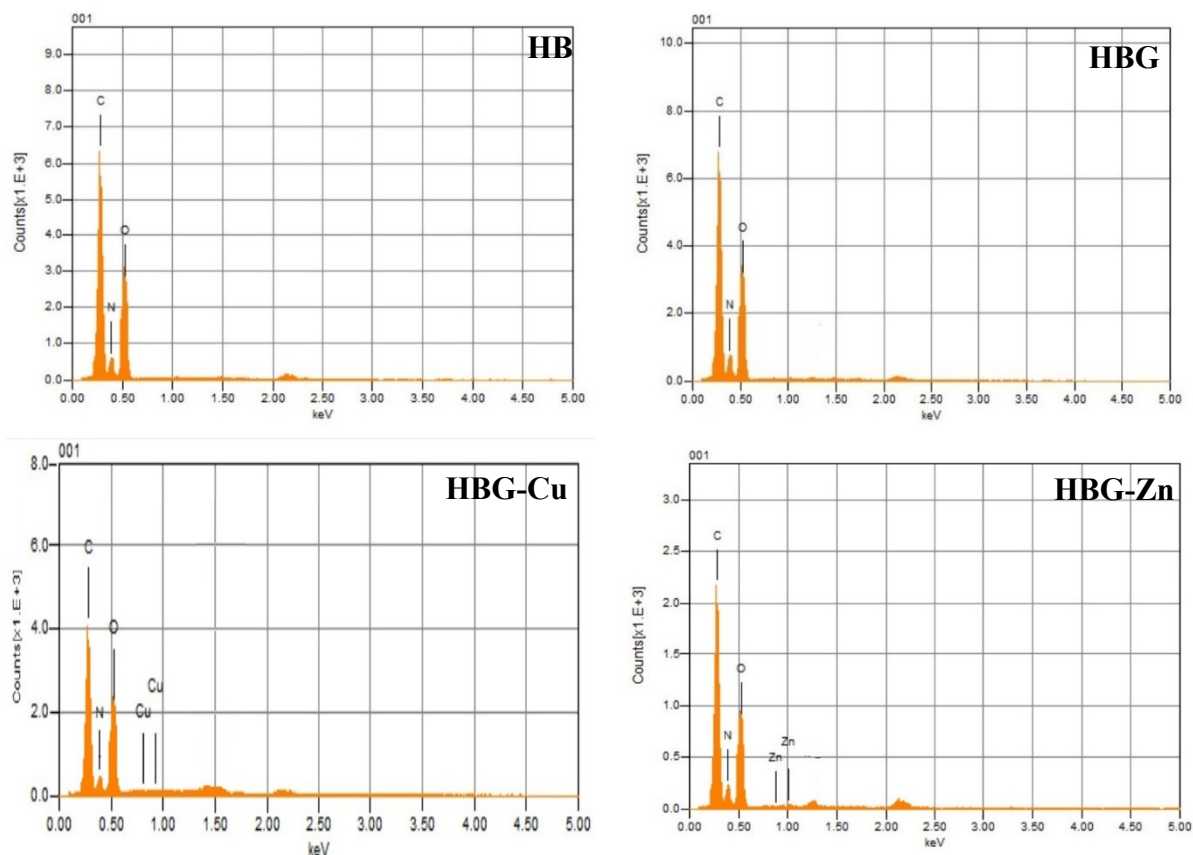

**Fig. S3** EDX spectra of multi cross-linked polyacrylamide hydrogels

**Table S1** Atomic percentage of each atom measured through EDX analysis for prepared multi cross-linked polyacrylamide hydrogels

| Hydrogels     | Atomic % |      |       |      |      |
|---------------|----------|------|-------|------|------|
|               | C        | N    | O     | Cu   | Zn   |
| <b>HB</b>     | 61.26    | 6.21 | 32.53 | -    | -    |
| <b>HBG</b>    | 61.10    | 6.92 | 31.98 | -    | -    |
| <b>HBG-Cu</b> | 63.23    | 6.30 | 30.43 | 0.04 | -    |
| <b>HBG-Zn</b> | 63.48    | 6.27 | 30.21 | -    | 0.04 |

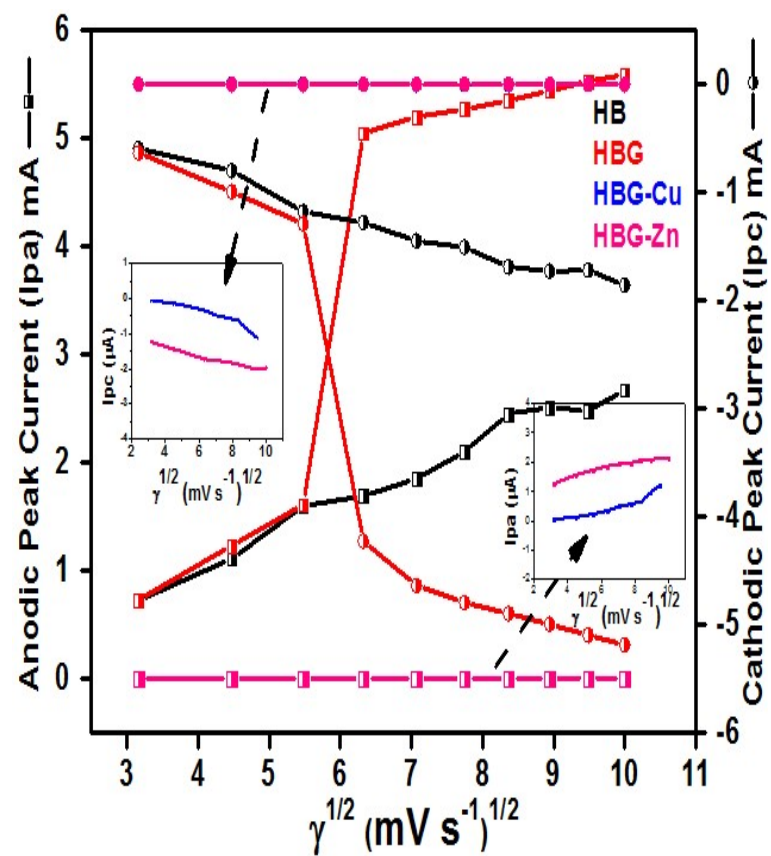

**Fig. S4** Anodic and Cathodic peak current of polyacrylamide based hydrogels

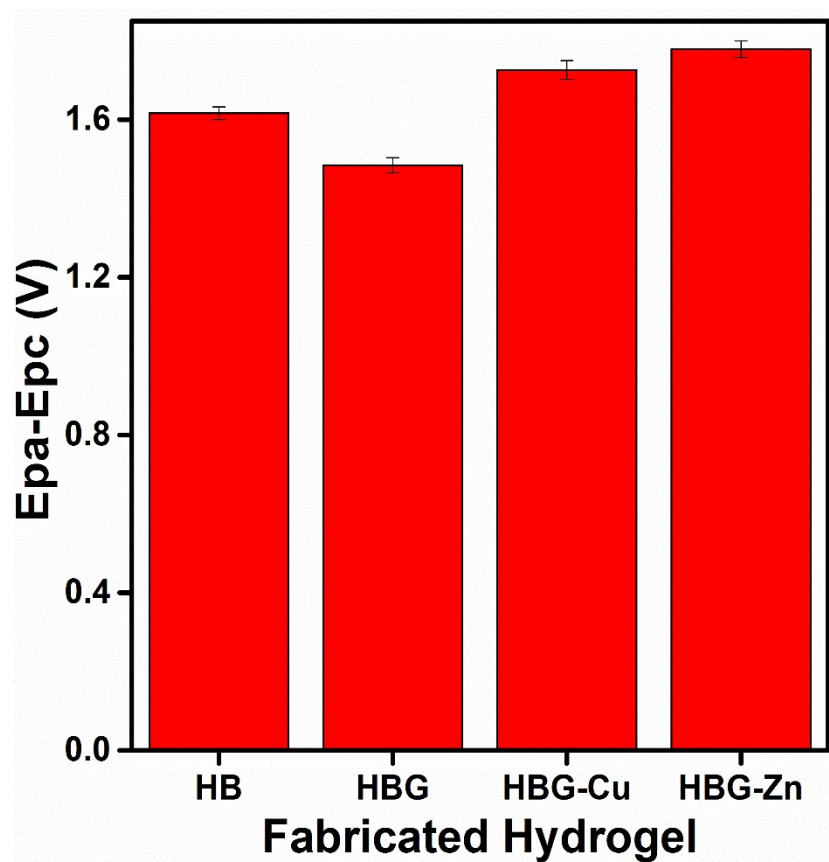

**Fig. S5** Peak potential separation of polyacrylamide based hydrogels

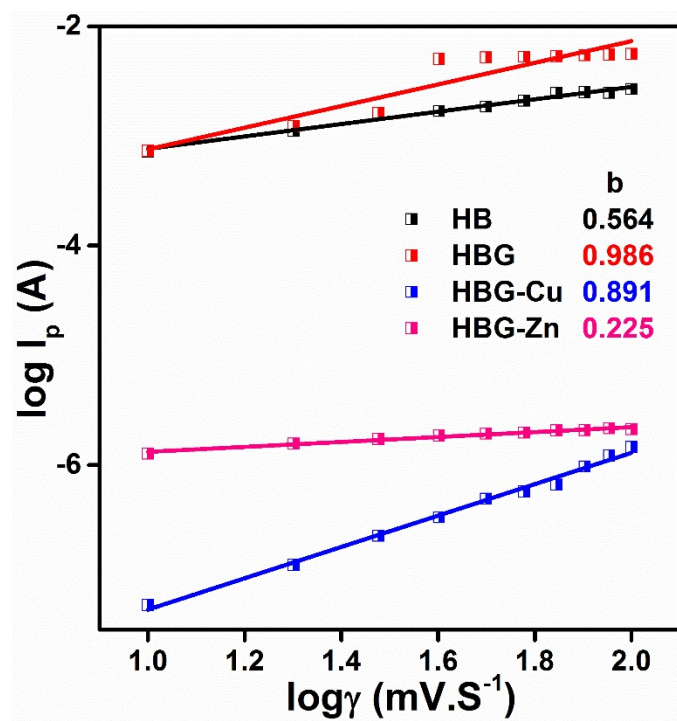

Fig. S6 Peak current at different sweep rates

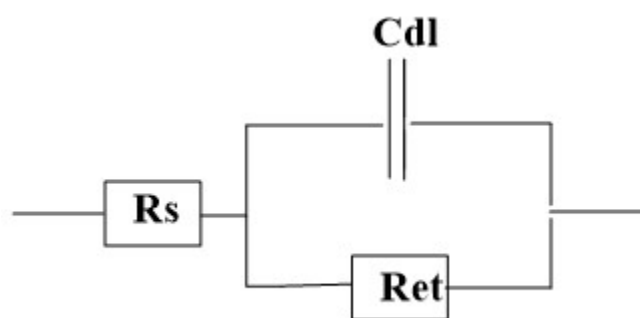

Fig. S7 Electrochemical circuit fit model for Polyacrylamide based hydrogels

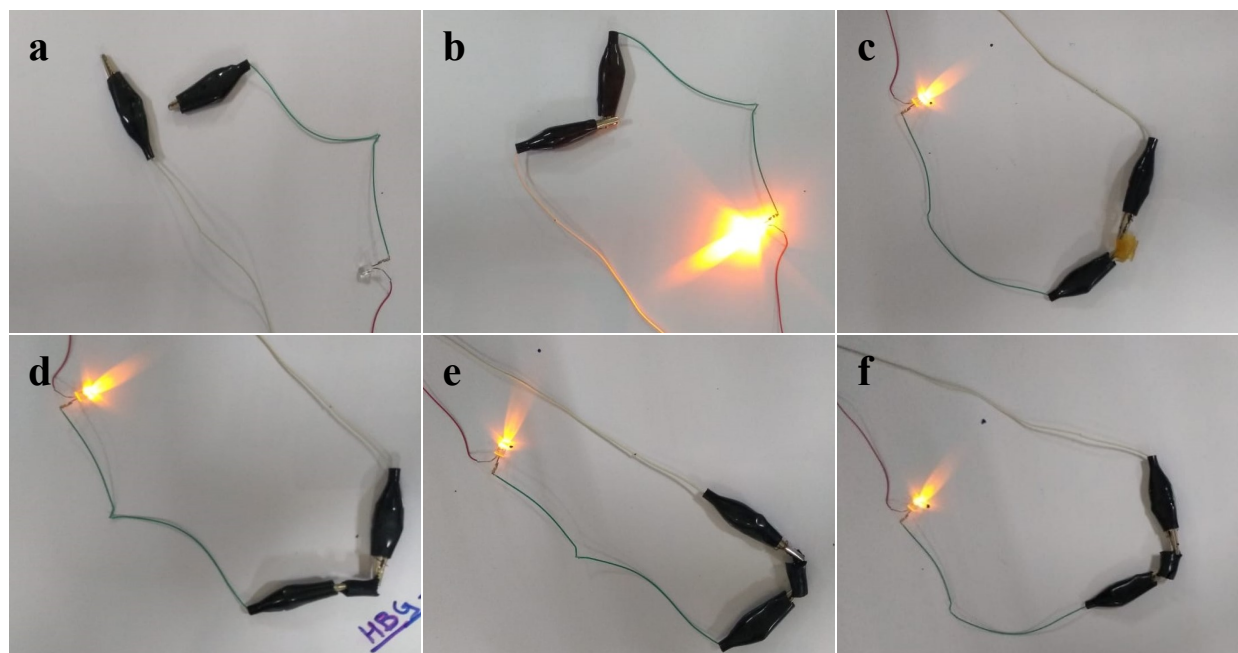

**Fig. S8** Light response towards applied external DC current i.e. not connected (a), terminals connected in the absence of Hydrogel (b), and in the presence of Hydrogels i.e. HB (c), HBG (d), HBG-Cu (e) and HBG-Zn (f)
